# Supplementary material for: The characteristics of mixing patterns of sexual dyads and factors correlated with condomless anal intercourse among men who have sex with men in Guangzhou, China
Source: Springer Nature journal article supplement (doi:10.1186/s12889-019-7082-9), 2019-06-10
Supplement: MOESM1 [file 16787346]

Questionnaire for MSM in Guangzhou

ID: \_\_\_\_\_

Please type "√" on the option or fill in the blank

Q1. What is your birthday? \_\_\_\_\_ year \_\_\_\_\_ month

Q2. What is your education degree?

- ① Primary school and below
- ② Middle school
- ③ High school
- ④ Undergraduate
- ⑤ Master's and above

Q3. What is your current marital status?

- ① Married
- ② Unmarried
- ③ Divorced
- ④ Other

Q5. What is your income in last year?

- ① <20000
- ② 20000-
- ③ 60001-
- ④ 120001-
- ⑤ >240000



**Note: The content included in this questionnaire is a part of our whole study. We just post the content which is related to this paper.**
