# Supplementary material for: The characteristics of mixing patterns of sexual dyads and factors correlated with condomless anal intercourse among men who have sex with men in Guangzhou, China
Source: Springer Nature journal article supplement (doi:10.1186/s12889-019-7082-9), 2019-06-10
Supplement: MOESM2 [file 16787346]

### The characteristics of communication between respondents and their sexual partners

| Variable     | Label                                                   | Value | Frequency<br>Count | Percent of Total<br>Frequency |
|--------------|---------------------------------------------------------|-------|--------------------|-------------------------------|
|              |                                                         | 1     | 476                | 17.8478                       |
| condom-fre   | the frequencu of condom use                             | 2     | 159                | 5.9618                        |
|              |                                                         | 3     | 474                | 17.7727                       |
|              |                                                         | 4     | 1558               | 58.4177                       |
|              |                                                         | 3     | 682                | 25.5718                       |
| finteraction | frequency of the social interaction<br>with the partner | 4     | 535                | 20.06                         |
|              |                                                         | 1     | 526                | 19.7225                       |
|              |                                                         | 5     | 481                | 18.0352                       |
|              |                                                         | 2     | 443                | 16.6104                       |
| inter        | meet with your sexual partners via<br>internet          | 0     | 607                | 10.8361                       |
|              |                                                         | 1     | 2060               | 77.2403                       |
|              |                                                         | 1     | 919                | 34.4582                       |
| intimacy     | the affective interaction with the<br>partner           | 3     | 557                | 20.8849                       |
|              |                                                         | 4     | 417                | 15.6355                       |
|              |                                                         | 2     | 416                | 15.5981                       |
|              |                                                         | 5     | 358                | 13.4233                       |
|              |                                                         | 5     | 856                | 32.096                        |
|              |                                                         | 7     | 738                | 27.6715                       |
|              |                                                         | 6     | 492                | 18.4477                       |
| pm           | place of meeting sexual partner                         | 4     | 194                | 7.2741                        |
|              |                                                         | 1     | 143                | 5.3618                        |
|              |                                                         | 8     | 99                 | 3.712                         |
|              |                                                         | 2     | 85                 | 3.1871                        |
|              |                                                         | 3     | 60                 | 2.2497                        |
|              |                                                         | 2     | 1047               | 39.2576                       |
| dur          | duration of the social interaction                      | 1     | 680                | 25.4968                       |
|              |                                                         | 3     | 661                | 24.7844                       |
|              |                                                         | 4     | 255                | 9.5613                        |
|              |                                                         | 5     | 24                 | 0.8999                        |
|              |                                                         | 1     | 1189               | 44.5819                       |
| sex-fre      | frequency of sex                                        | 2     | 647                | 24.2595                       |
|              |                                                         | 3     | 458                | 17.1729                       |
|              |                                                         | 4     | 341                | 12.7859                       |
|              |                                                         | 5     | 32                 | 1.1999                        |
|              |                                                         | 3     | 707                | 26.5092                       |
| nominated    | the number of the sexual partners<br>of each respondant | 4     | 694                | 26.0217                       |
|              |                                                         | 5     | 547                | 20.5099                       |
|              |                                                         | 6     | 201                | 7.5366                        |
|              |                                                         | 7     | 115                | 4.312                         |

|    |     |        |
|----|-----|--------|
| 2  | 108 | 4.0495 |
| 9  | 71  | 2.6622 |
| 10 | 63  | 2.3622 |
| 8  | 51  | 1.9123 |
| 11 | 39  | 1.4623 |
| 13 | 22  | 0.8249 |
| 1  | 20  | 0.7499 |
| 18 | 18  | 0.6749 |
| 16 | 11  | 0.4124 |

---
